# Supplementary material for: Microwave versus conventional promoted synthesis of fuel additives using graphitic carbon nitride supported catalysts
Source: Royal Society of Chemistry journal article supplement (doi:10.1039/d3se00712j), 2023-01-01
Supplement: d3se00712j1.pdf [file d3se00712j1.pdf]

## Microwave versus Batch Reactor promoted Synthesis of Fuel Additives using Graphitic Carbon Nitride Supported Catalysts

Daniele Polidoro<sup>1,2</sup>, Alina M. Balu,<sup>1</sup> Maurizio Selva,<sup>2</sup> Sameh M. Osman<sup>3</sup>, Rafael Luque<sup>3,4\*</sup>,  
Tripti Chhabra<sup>1\*</sup>

<sup>1</sup>*Departamento de Química Organica, Universidad de Cordoba, Ctra Nnal IV-A, Km 396, E14014, Cordoba, Spain, e-mail: [qo2chcht@uco.es](mailto:qo2chcht@uco.es)*

<sup>2</sup>*Department of Molecular Science and Nanosystem Ca' Foscari, Università di Venezia Via torino 155, 30172, Venezia Mestre (Italy)*

<sup>3</sup>*Chemistry Department, College of Science, King Saud University, P.O. Box 2455, Riyadh, 11451, Saudi Arabia, e-mail: [rafael.luque@ksu.edu.sa](mailto:rafael.luque@ksu.edu.sa)*

<sup>4</sup>*Universidad ECOTEC, Km. 13.5 Samborondon, Samborondon, EC092302, Ecuador*

| Sl. No. | Content | Pg. |
|---------|---------|-----|
|---------|---------|-----|

|   |                                                                                                                                  | <b>No.</b> |
|---|----------------------------------------------------------------------------------------------------------------------------------|------------|
| 1 | N <sub>2</sub> adsorption desorption isotherm curves and BET surface area plots of GCN, GCN-PMA and GCN-PTA ( <b>Figure S1</b> ) | 3          |
| 2 | Pore size curves of GCN, GCN-PMA and GCN-PTA ( <b>Figure S2</b> )                                                                | 4          |
| 3 | <sup>1</sup> H NMR of methyl levulinate ( <b>Figure S3</b> )                                                                     | 5          |
| 4 | <sup>13</sup> C NMR of methyl levulinate ( <b>Figure S4</b> )                                                                    | 6          |
| 5 | Mass Spectrum of methyl levulinate ( <b>Figure S5</b> )                                                                          | 7          |
| 6 | Mass Spectrum of ethyl levulinate ( <b>Figure S6</b> )                                                                           | 8          |
| 7 | Mass Spectrum of isopropyl levulinate ( <b>Figure S7</b> )                                                                       | 9          |
| 8 | Mass Spectrum of butyl levulinate ( <b>Figure S8</b> )                                                                           | 10         |
| 9 | Mass Spectrum of allyl levulinate ( <b>Figure S9</b> )                                                                           | 11         |

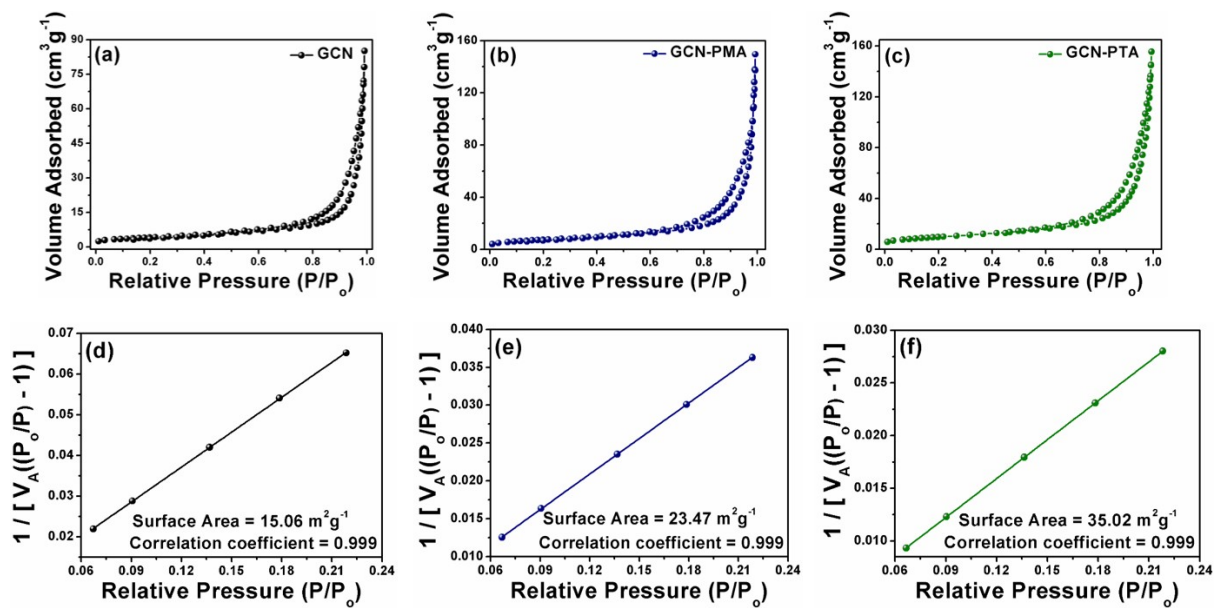

**Figure S1:** (a, b, c)  $N_2$  adsorption desorption isotherm curves and (d, e, f) BET surface area plots of GCN, GCN-PMA and GCN-PTA.

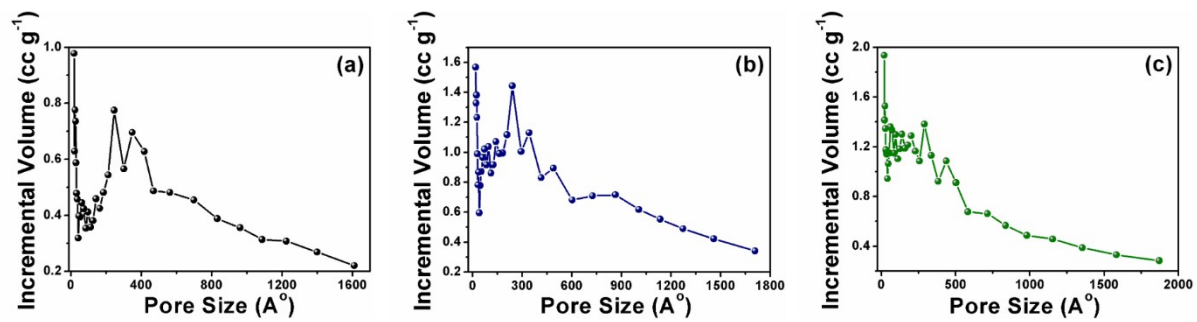

**Figure S2:** Pore size curves of (a) GCN, (b) GCN-PMA and (c) GCN-PTA.

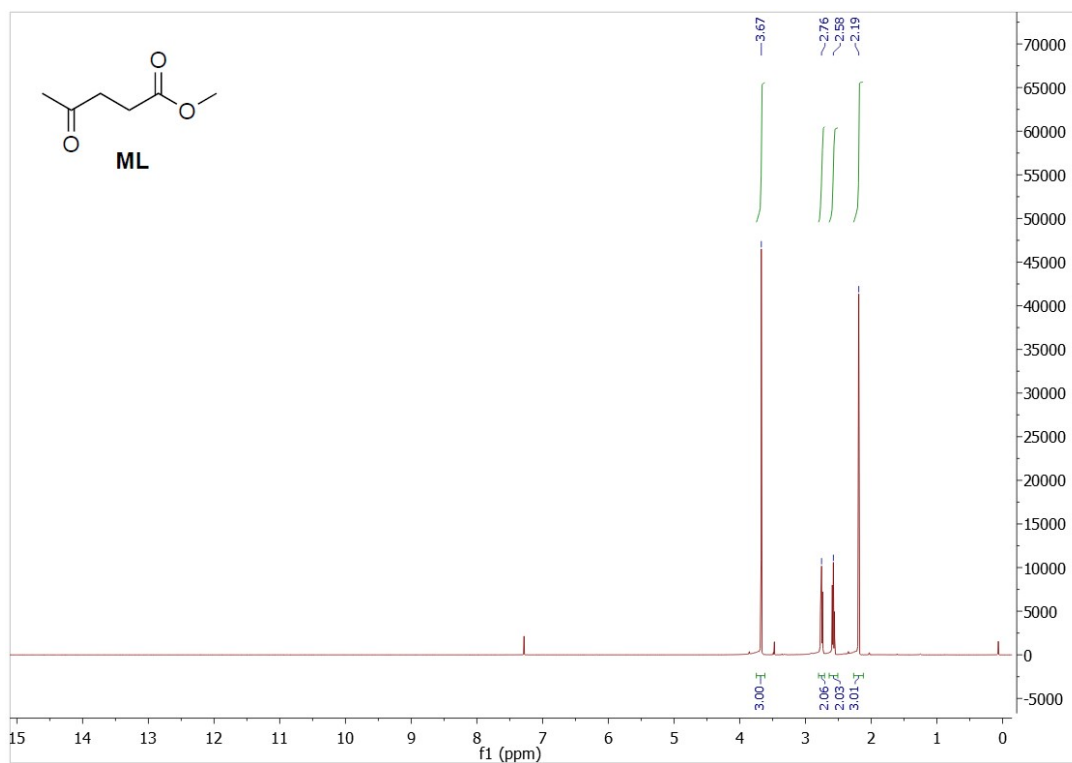

**Figure S3:**  $^1\text{H NMR}$  of methyl levulinate.  $^1\text{H NMR}$  (400 MHz, 298 K,  $\text{CDCl}_3$ )  $\delta$  3.67 (s, 3H), 2.76 (t, 2H), 2.58 (t, 2H), 2.19 (s, 3H).

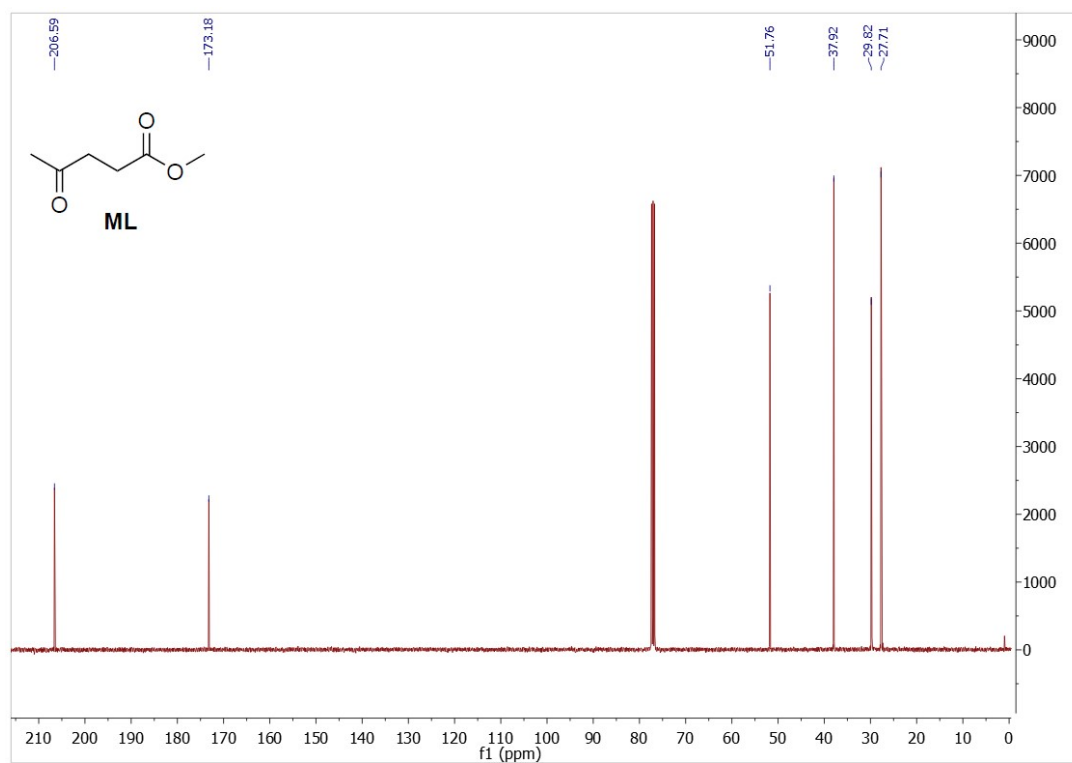

**Figure S4:** <sup>13</sup>C NMR of methyl levulinate. <sup>13</sup>C NMR (101 MHz, 298 K, CDCl<sub>3</sub>) δ 206.59, 173.18, 51.76, 37.92, 29.82, 27.71.

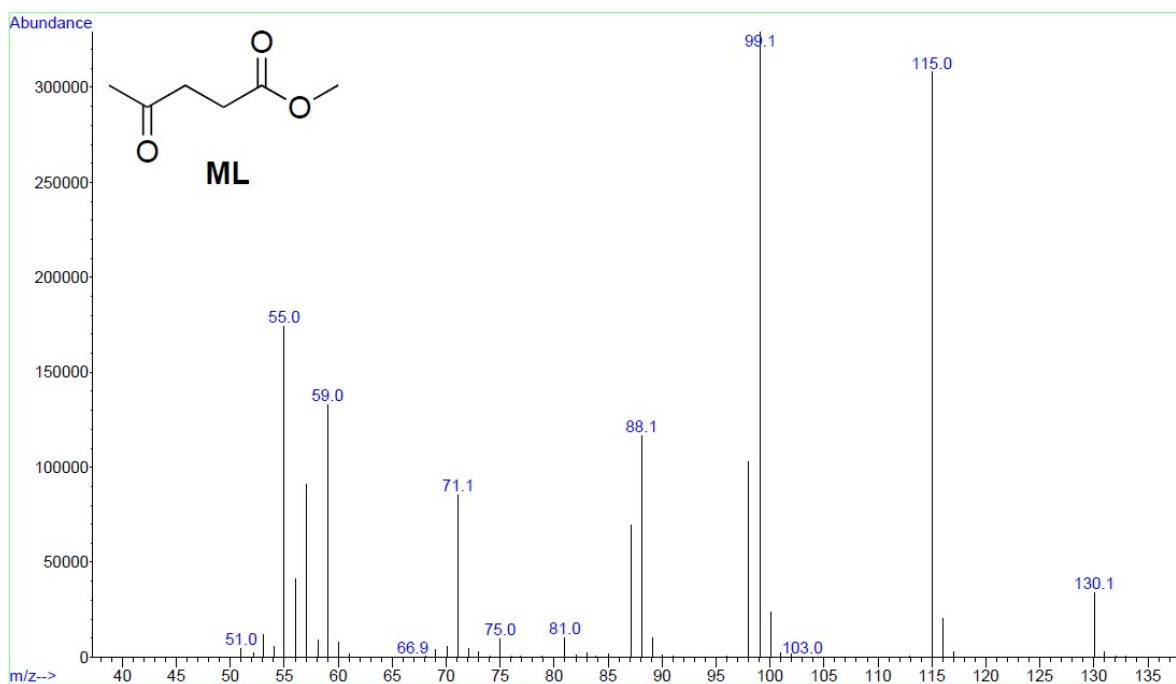

**Figure S5:** Mass Spectrum of methyl levulinate (EI, 70 eV).

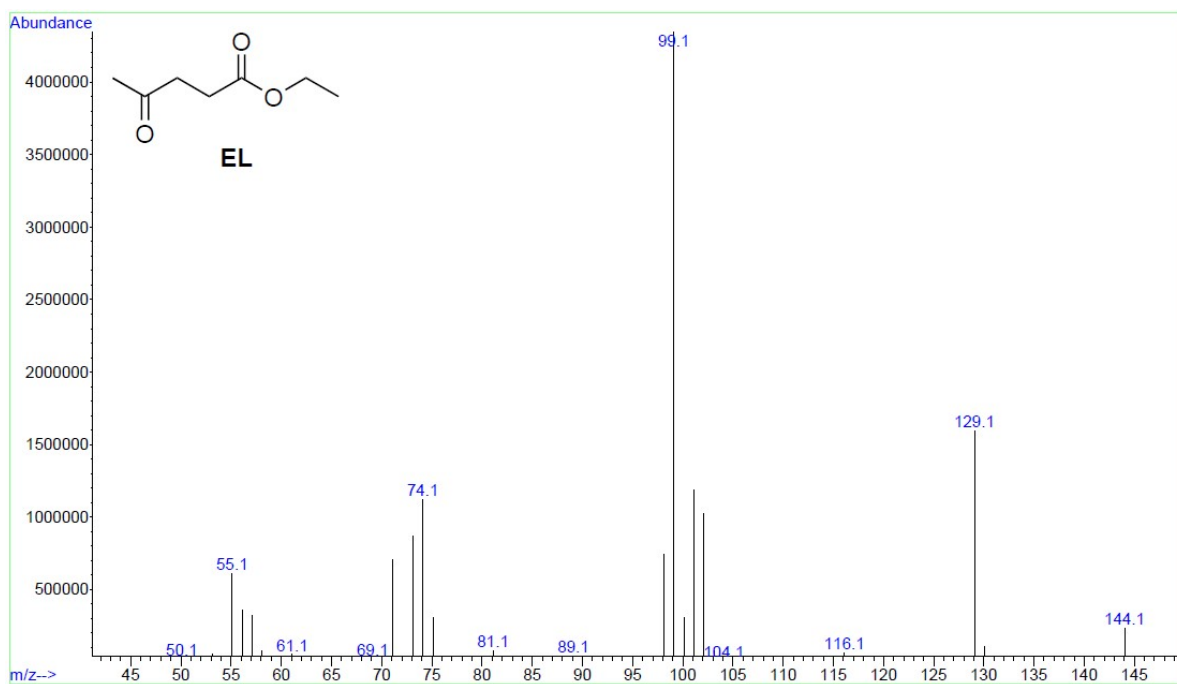

**Figure S6:** Mass Spectrum of ethyl levulinate (EL) (EI, 70 eV).



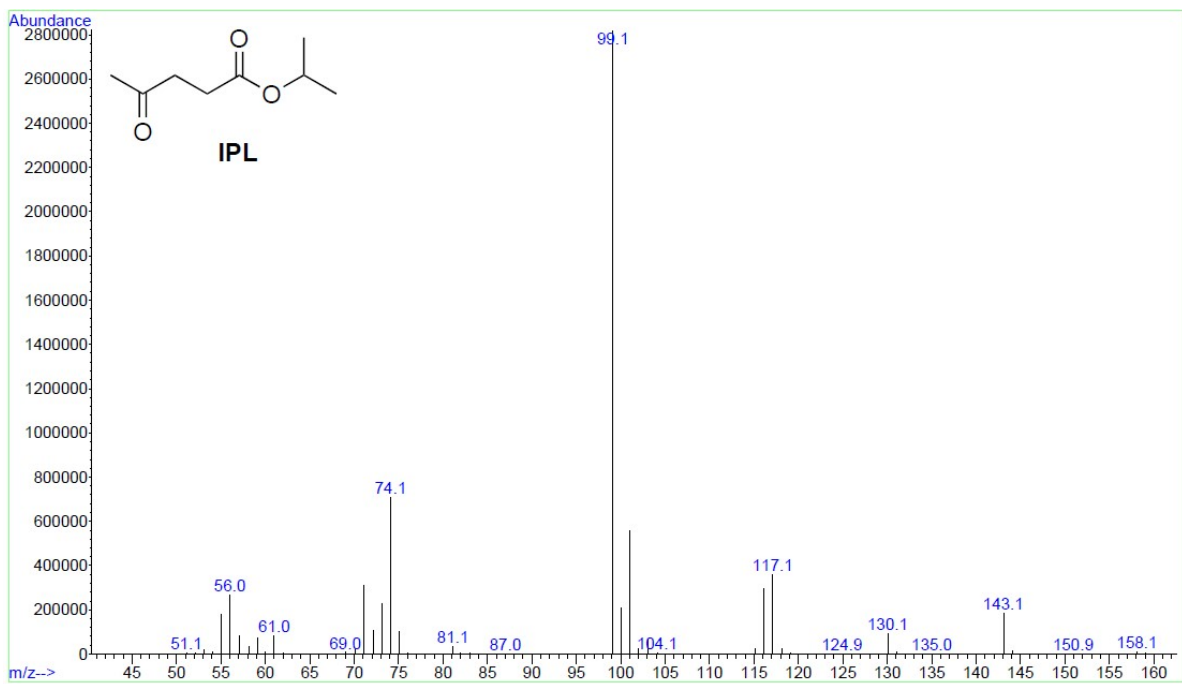

**Figure S7:** Mass Spectrum of isopropyl levulinate (EI, 70 eV).

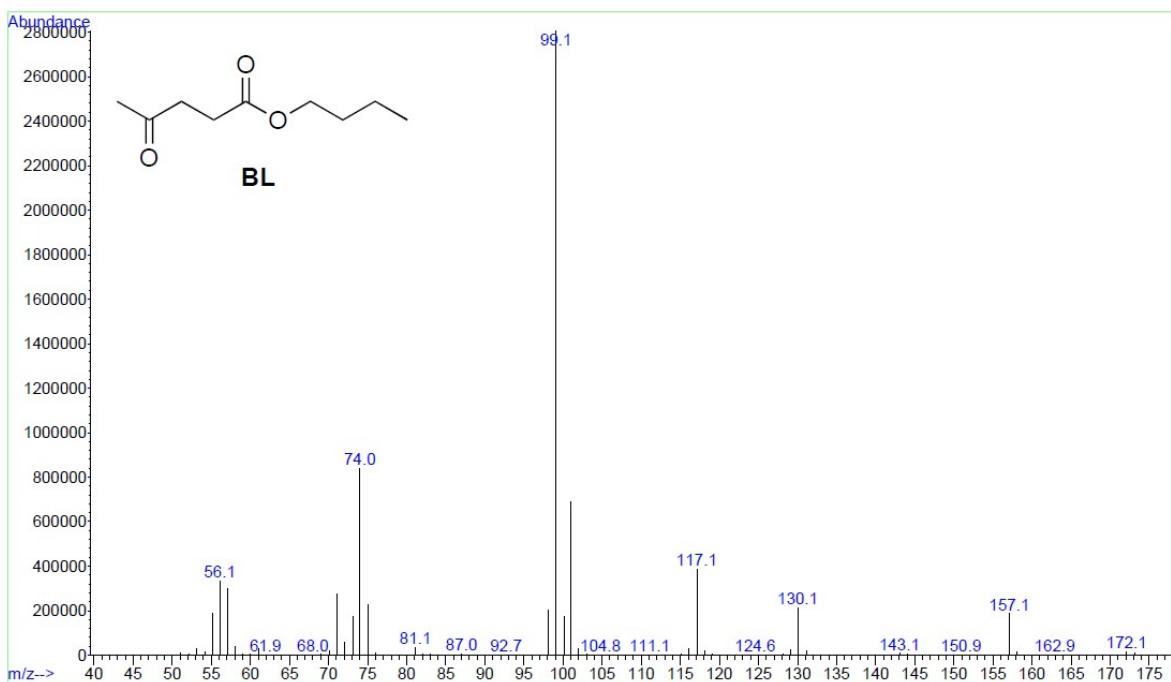

**Figure S8:** Mass Spectrum of butyl levulinate (EI, 70 eV).

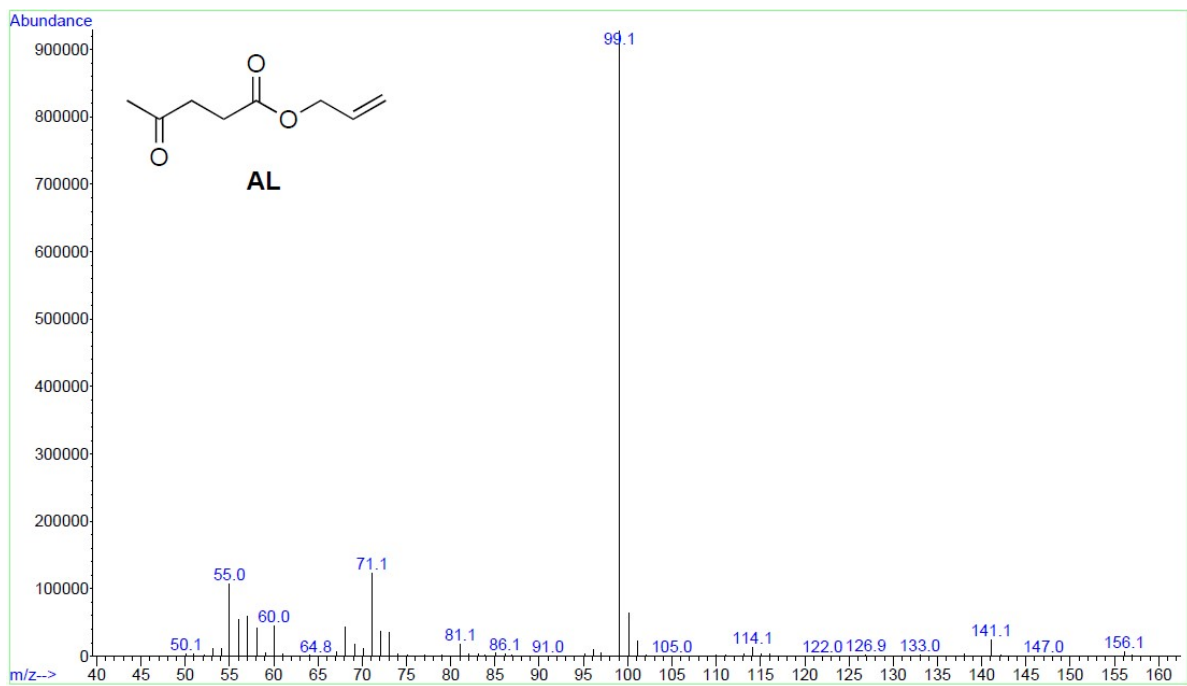

**Figure S9:** Mass Spectrum of allyl levulinate (EI, 70 eV).
